# Supplementary material for: Heat hardening enhances mitochondrial potential for respiration and oxidative defence capacity in the mantle of thermally stressed Mytilus galloprovincialis
Source: PubMed Central journal article supplement (PMC8384858; doi:10.1038/s41598-021-96617-9), 2021-08-24

**Heat hardening enhances mitochondrial potential for respiration and oxidative defence capacity in the mantle of thermally stressed *Mytilus galloprovincialis***

**Ioannis Georgoulis<sup>1</sup>, Konstantinos Feidantsis<sup>1</sup>, Ioannis A. Giantsis<sup>2</sup>,  
Asimina Kakale<sup>1</sup>, Christian Bock<sup>3</sup>, Hans O. Pörtner<sup>3</sup>, Inna M. Sokolova<sup>4</sup>  
and Basile Michaelidis<sup>1\*</sup>**

**<sup>1</sup>Laboratory of Animal Physiology, Department of Zoology, School of Biology,  
Aristotle University of Thessaloniki, GR-54124 Thessaloniki, Greece**

**<sup>2</sup>Department of Animal Science, Faculty of Agricultural Sciences, University of  
Western Macedonia, 53100 Florina, Greece**

**<sup>3</sup>Alfred-Wegener-Institut, Helmholtz-Center for Polar and Marine Research,  
Integrative Ecophysiology, Postfach 120161, 27515 Bremerhaven, Germany**

**<sup>4</sup>Department of Marine Biology, Institute for Biological Sciences, University of  
Rostock, A.-Einstein Str., 3, 18055 Rostock, Germany**

**\*To whom correspondence should be addressed: [michaeli@bio.auth.gr](mailto:michaeli@bio.auth.gr)**

**Figure S1:** The complete original immunoblots shown in Figure 2 are presented in order below. The individual parts comprising Figure 2 are specified using black boxes.

**Cropped blots in main paper**

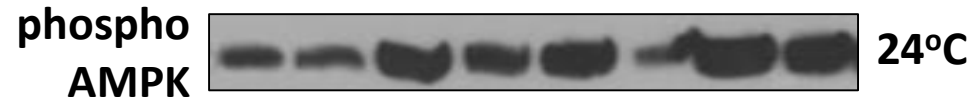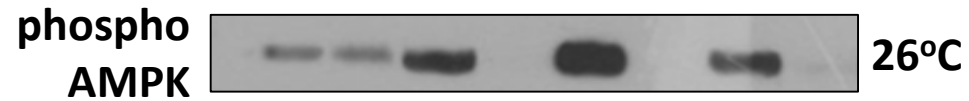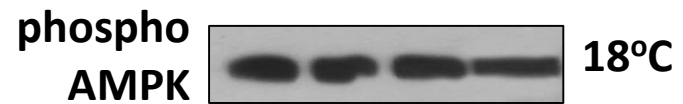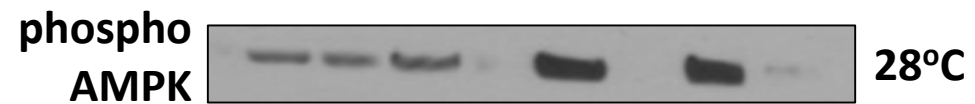

**Original blots in supplementary information**

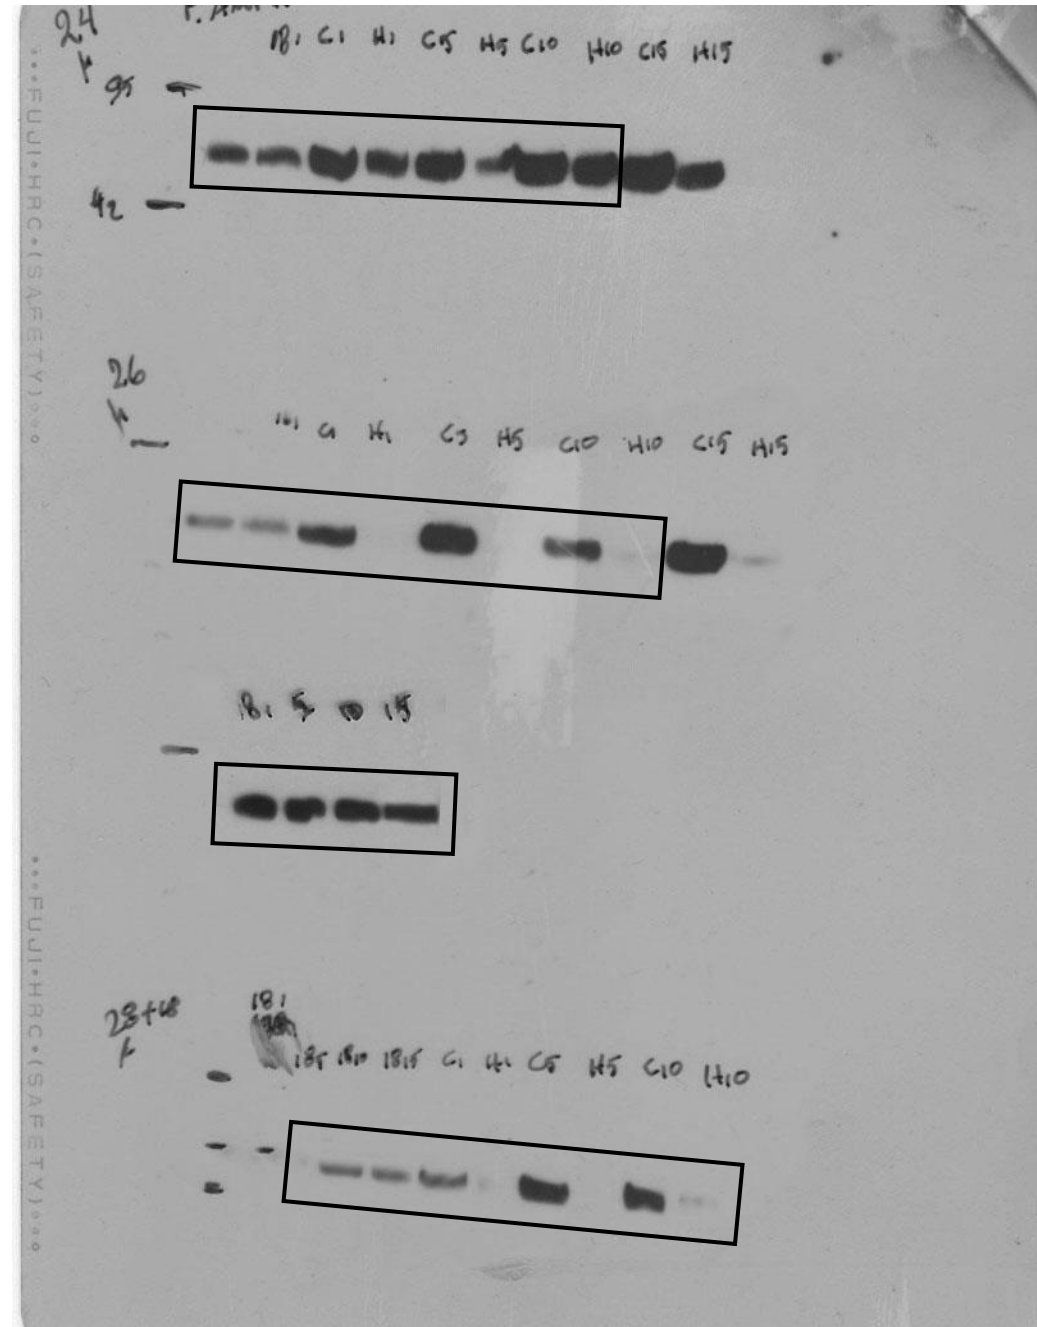

**Figure S2:** The complete original immunoblots shown in Figure 6 are presented in order below. The individual parts comprising Figure 6 are specified using black boxes.

**Cropped blots in main paper**

Hsp70 24°C

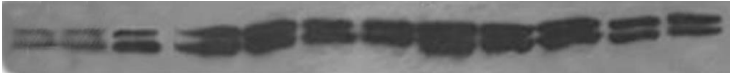

Hsp70 26°C

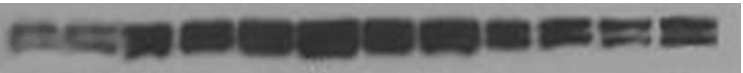

Hsp70 18°C

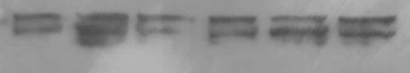

Hsp70 28°C

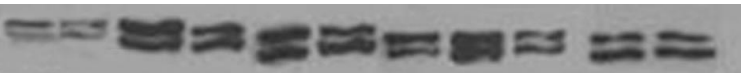

**Original blots in supplementary information**

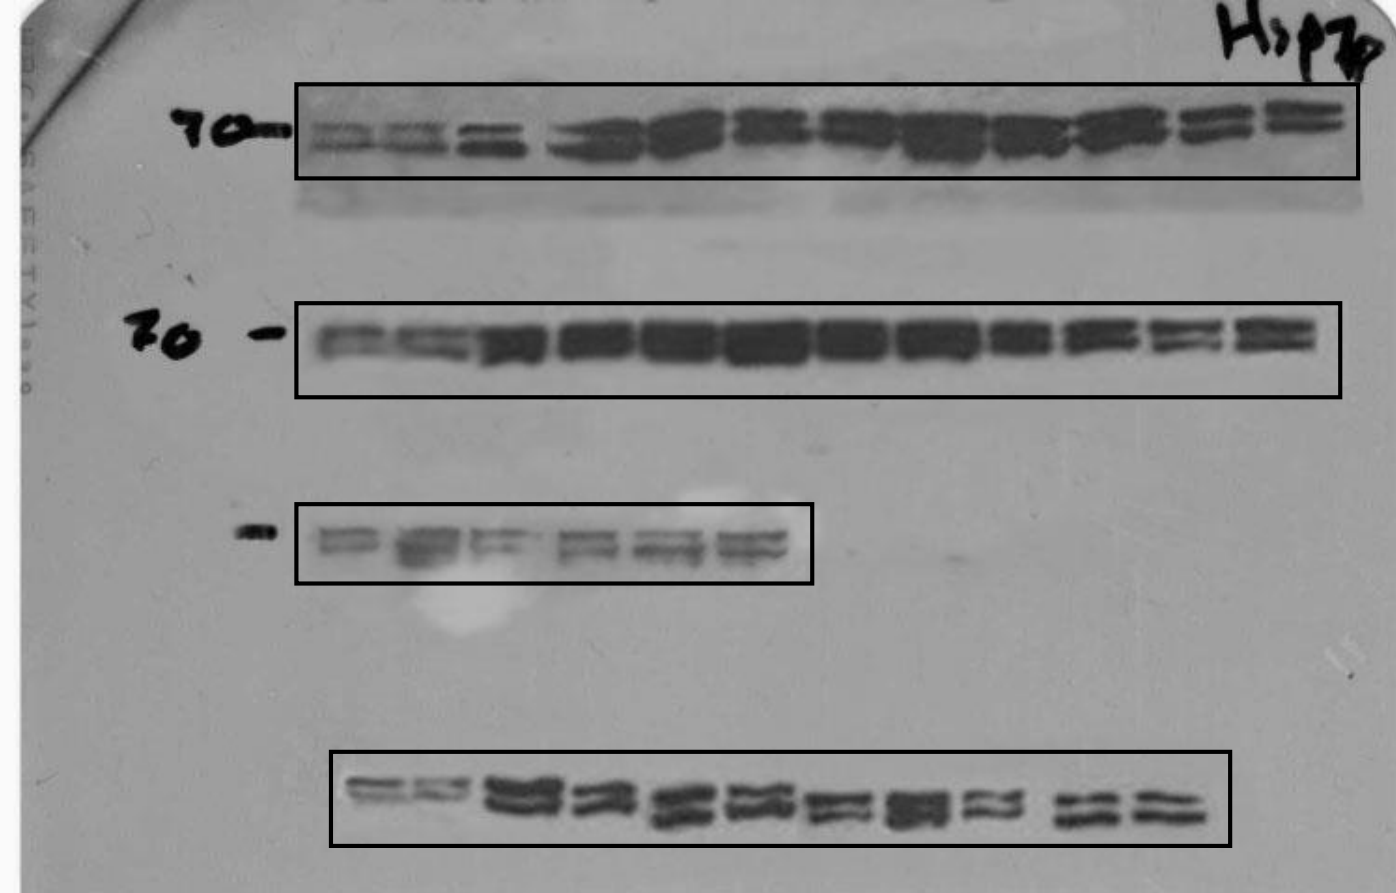

Supplement: 41598_2021_96617_MOESM1_ESM.pdf [file 41598_2021_96617_MOESM1_ESM.pdf]
